# Supplementary material for: Understanding room-temperature π-dimerisation of radical ions: intramolecular π-[TTF]22+ in functionalised calix[4]arenes
Source: Royal Society of Chemistry journal article supplement (doi:10.1039/c6cp07794c), 2017-01-01
Supplement: c6cp07794c1.pdf [file c6cp07794c1.pdf]

# Understanding room-temperature $\pi$ -dimerisation of radical ions: Intramolecular $\pi$ -[TTF] $_2^{2+}$ in functionalised calix[4]arenes

*Maria Fumanal,<sup>a,b</sup> Marçal Capdevila-Cortada<sup>c,\*</sup> and Juan J. Novoa<sup>a,\*</sup>*

(a) Departament de Química Física and IQTCUB, Universitat de Barcelona, Av. Diagonal 645, 08028, Barcelona, Spain; (b) Current address: Laboratoire de chimie quantique, Institut de Chimie UMR7177 CNRS-Université de Strasbourg, 1 Rue Blaise Pascal BP 296/R8, F-67007 Strasbourg, France; (c) Institute of Chemical Research of Catalonia (ICIQ), The Barcelona Institute of Science and Technology, Av. Països Catalans 16, 43007 Tarragona, Spain.

E-mail: mcapdevila@iciq.es; juan.novoa@ub.edu

## Electronic Supporting Information

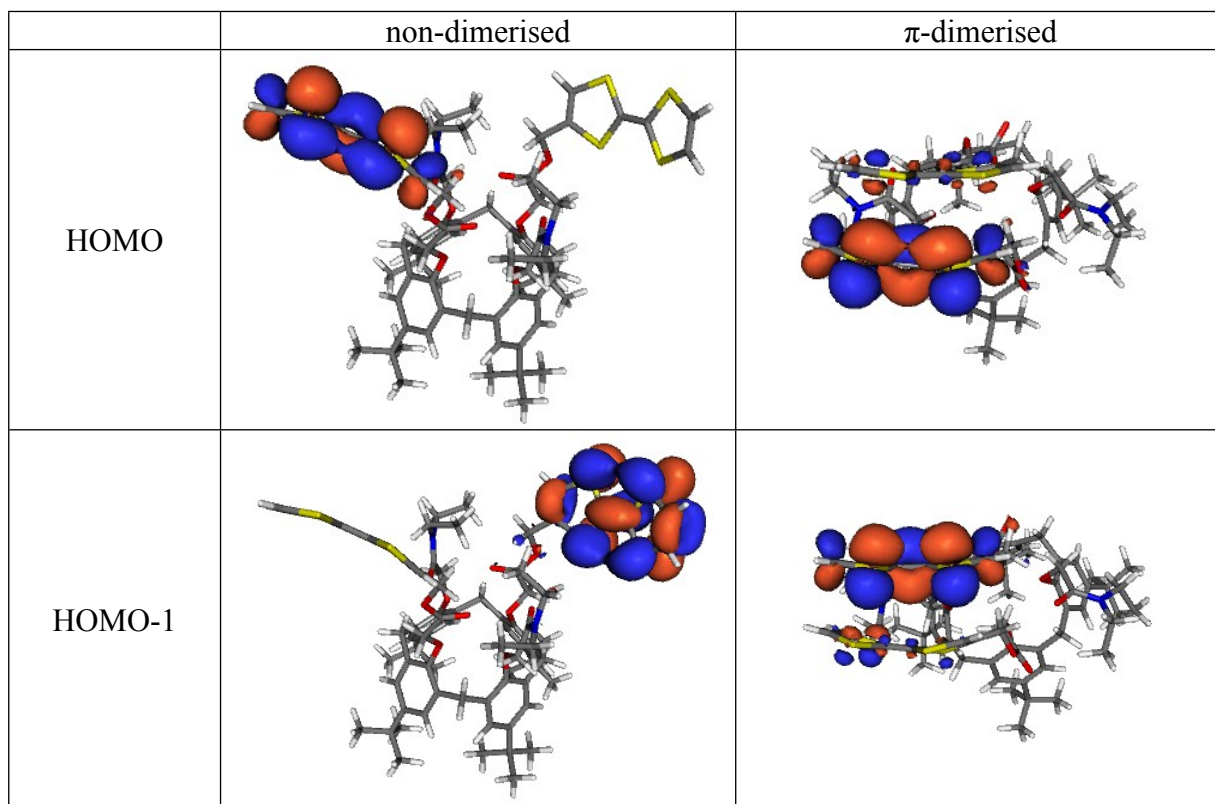

**Figure S1.** HOMO and HOMO-1 molecular orbitals of  $\pi$ -dimerised and non-dimerised [calix]<sup>0</sup> obtained with M06-L/6-31G(d,p) using PCM for simulating the acetonitrile solvent.

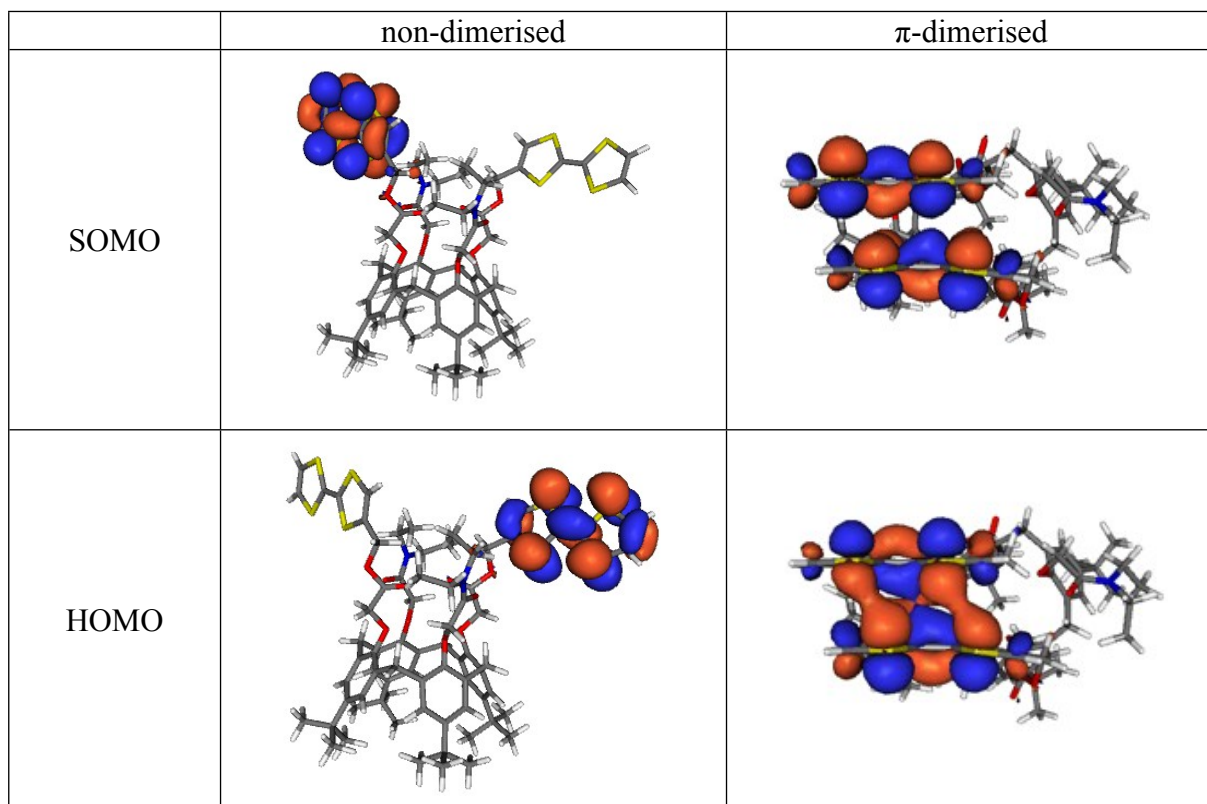

**Figure S2.** SOMO and HOMO molecular orbitals of  $\pi$ -dimerised and non-dimerised [calix] $\cdot^+$  obtained with M06-L/6-31G(d,p) using PCM for simulating the acetonitrile solvent.

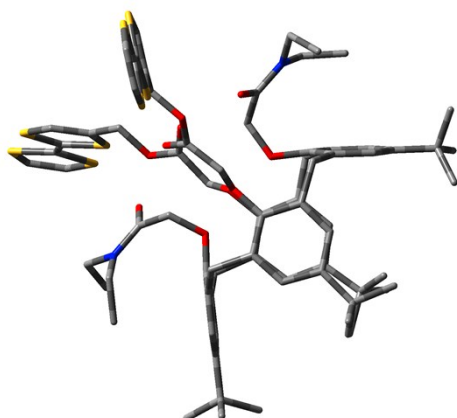

**Figure S3.** Optimum geometry of [calix]<sup>2+</sup> molecule in its conformation **C** non-dimerised form, obtained at the M06-L/6-31G(d,p) level, in PCM-acetonitrile. The hydrogen atoms are hidden for clarity.

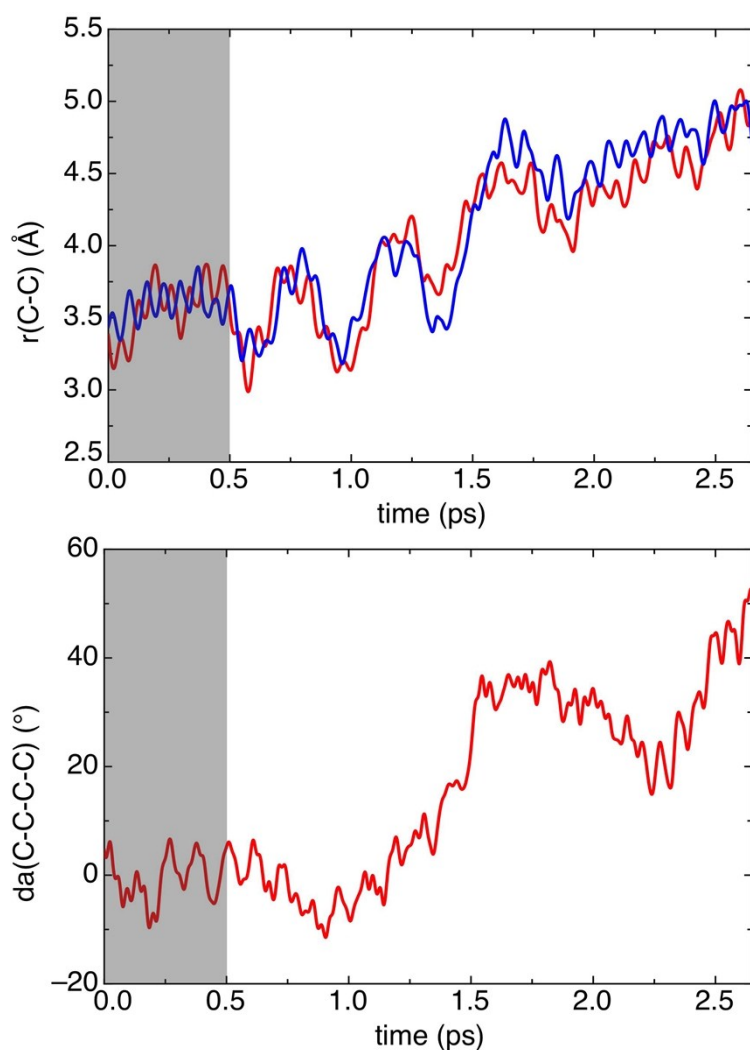

**Figure S4.** Time evolution of the two  $r(\text{C-C})$  distances between the central carbon atoms of the TTF units of the  $[\text{calix}]^{2+}$  (*top*) and the dihedral angle C-C-C-C defined by these central C atoms (*bottom*) along the AIMD simulations performed in implicit acetonitrile solution. The grey region denotes equilibration. The initial configuration prior equilibration was the  $\pi$ -dimerised  $[\text{calix}]^{2+}$  form.

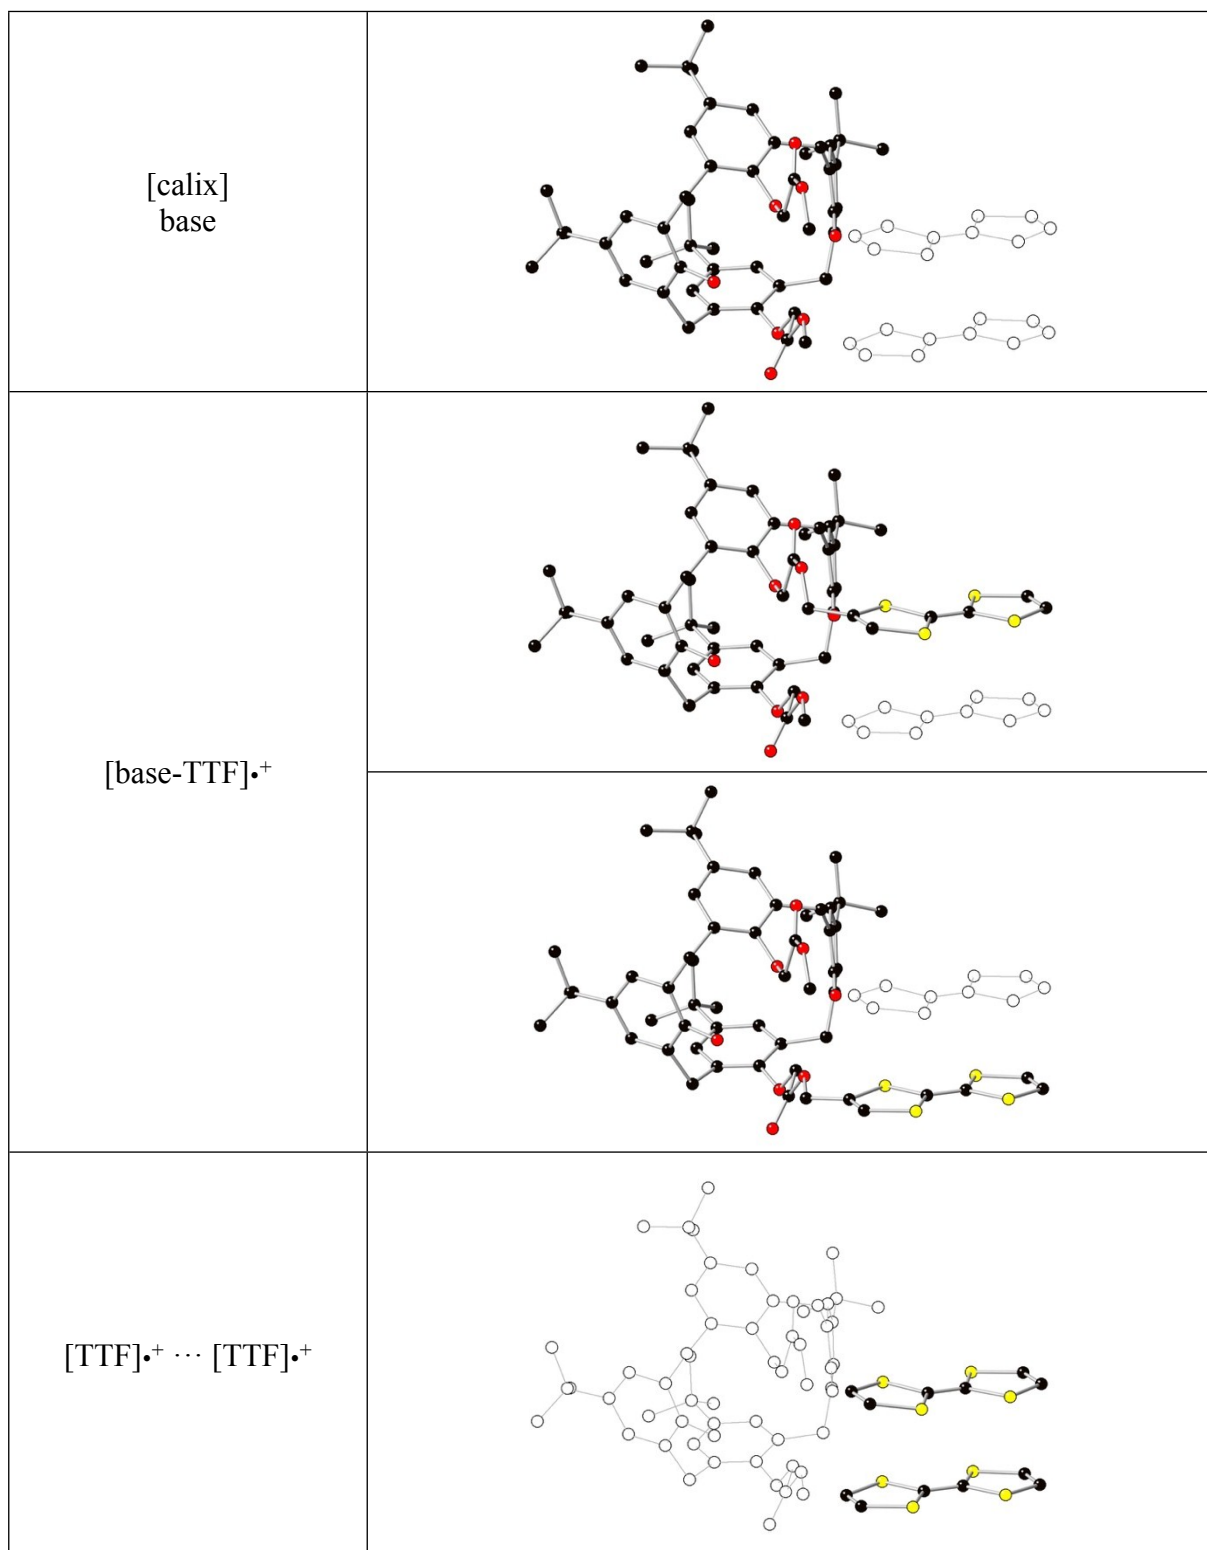

**Figure S5.** Fragments considered to evaluate their contribution to the total potential energy curve of the  $[\text{calix}]^{2+}$ : the [calix]-base, the  $[\text{base-TTF}]^{\bullet+}$  and the  $[\text{TTF}]^{\bullet+} \cdots [\text{TTF}]^{\bullet+}$ . The hydrogen atoms are hidden for clarity.

**Table S1.** Mulliken atomic charges of the two TTF fragments at the ground state of the different oxidation states of the  $\pi$ -dimerised and non-dimerised [calix]<sup>n+</sup> (n = 0-2) obtained with M06-L/6-31G(d,p) using PCM for simulating the acetonitrile solvent.

|                       | non-dimerised |      | $\pi$ -dimerised |      |
|-----------------------|---------------|------|------------------|------|
|                       | TTF1          | TTF2 | TTF1             | TTF2 |
| [calix] <sup>0</sup>  | 0.00          | 0.01 | -0.07            | 0.01 |
| [calix] <sup>•+</sup> | 0.00          | 0.89 | 0.45             | 0.30 |
| [calix] <sup>2+</sup> | 0.89          | 0.89 | 0.87             | 0.82 |

**Table S2.** Electron density (in atomic units) at the bond critical points depicted in Figure 5 of the main text. The C<sub>1</sub> and C<sub>4</sub> are averaged values of the outer carbon atoms.

|                                              | $\pi$ -[TTF] <sub>2</sub> <sup>2+</sup> | $\pi$ -dimerised [calix] <sup>2+</sup> |
|----------------------------------------------|-----------------------------------------|----------------------------------------|
| Density @ C <sub>1</sub> -C <sub>1</sub> bcp | $4.2 \cdot 10^{-3}$                     | $5.8 \cdot 10^{-3}$                    |
| Density @ S <sub>1</sub> -S <sub>1</sub> bcp | $1.1 \cdot 10^{-2}$                     | $1.1 \cdot 10^{-2}$                    |
| Density @ S <sub>2</sub> -S <sub>2</sub> bcp | $1.1 \cdot 10^{-2}$                     | $1.3 \cdot 10^{-2}$                    |
| Density @ C <sub>2</sub> -C <sub>2</sub> bcp | $6.2 \cdot 10^{-3}$                     | $6.5 \cdot 10^{-3}$                    |
| Density @ C <sub>3</sub> -C <sub>3</sub> bcp | $6.2 \cdot 10^{-3}$                     | $6.1 \cdot 10^{-3}$                    |
| Density @ S <sub>3</sub> -S <sub>3</sub> bcp | $1.1 \cdot 10^{-2}$                     | $9.4 \cdot 10^{-3}$                    |
| Density @ S <sub>4</sub> -S <sub>4</sub> bcp | $1.1 \cdot 10^{-2}$                     | $1.1 \cdot 10^{-2}$                    |
| Density @ C <sub>4</sub> -C <sub>4</sub> bcp | $4.2 \cdot 10^{-3}$                     | $3.8 \cdot 10^{-3}$                    |
